# Supplementary material for: In Situ Grown Vertically Oriented Graphene Coating on Copper by Plasma-Enhanced CVD to Form Superhydrophobic Surface and Effectively Protect Corrosion
Source: MDPI journal article supplement (doi:10.3390/nano12183202), 2022-09-15
Supplement: s1 [file s1]

# In Situ Grown Vertically Oriented Graphene Coating on Copper by Plasma-Enhanced CVD to Form Superhydrophobic Surface and Effectively Protect Corrosion

Xiaohang Zheng, Yaqian Yang, Yi Xian, Heng Chen, Wei Cai \*

Harbin Institute of Technology, School of Materials Science and Engineering, Harbin 150001, China  
\* Correspondence: weicai@hit.edu.cn

**Table S1.** Corrosion parameters obtained from PDS measurements for the Cu, GS-Cu and VFG-Cu.

| Sample | $j_{\text{corr}}$ (A/cm <sup>2</sup> ) | $E_{\text{corr}}$ (V) | $v_{\text{corr}}$ (mm/year) |
|--------|----------------------------------------|-----------------------|-----------------------------|
| Cu     | $6.09 \times 10^{-6}$                  | -0.289                | $7.57 \times 10^{-2}$       |
| GS-Cu  | $7.09 \times 10^{-7}$                  | -0.209                | $8.21 \times 10^{-3}$       |
| VFG-Cu | $7.90 \times 10^{-8}$                  | -0.125                | $9.14 \times 10^{-4}$       |

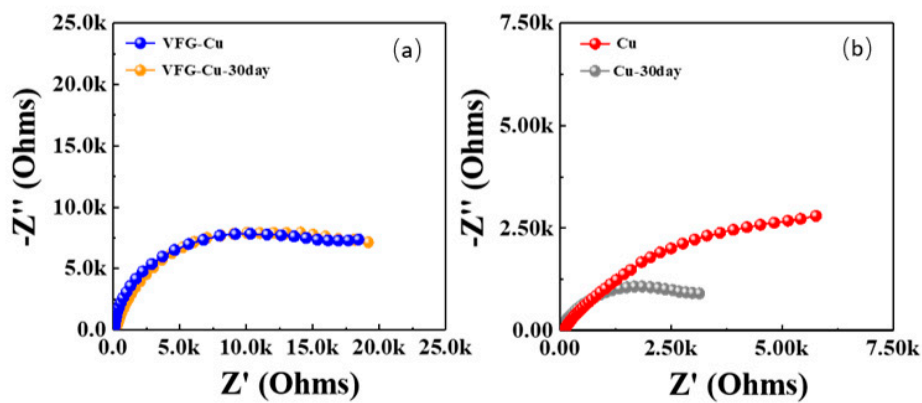

**Figure S1.** Nyquist plots for (a) VFG-Cu and (b) Cu after exposure to 3.5% NaCl solution for 1 month.
